# Supplementary material for: Peptide:glycosaminoglycan hybrid hydrogels as an injectable intervention for spinal disc degeneration
Source: J Mater Chem B. 2016 May 21;4(19):3225–31. doi: 10.1039/c6tb00121a (PMC4920072; doi:10.1039/c6tb00121a)
Supplement: Supplementary file 1 [file TB-004-C6TB00121A-s001.pdf]

## Electronic Supporting Information

### Peptide:Glycosaminoglycan hybrid hydrogels as an injectable intervention for spinal disc degeneration

*Danielle E. Miles, Elizabeth A. Mitchell, Nikil Kapur, Paul A. Beales and Ruth K. Wilcox*

### Full Experimental Methods

Peptides were custom synthesised (Polypeptide group, Denmark, NeoMPS, France or CS Bio, USA). Peptide quality control was undertaken by the synthesis company and confirmed in-house (**Table 1** and **Table S3**).

The peptide content reflects non-peptide molecules present in the dry peptide mass; these were mainly residual amounts of water, ammonium counterions bound on negatively charged peptide groups and trifluoroacetic acid (TFA) counterions bound on positively charged groups. All peptides were stored freeze-dried at -20°C.

Throughout this work the terminology GAG and CS refers to chondroitin sulphate sodium salt from shark cartilage (Sigma Aldrich) and 1:n refers to the molar ratio of one peptide to n GAG dimer subunits (Mw 477).

All samples stored and experiments carried out at room temperature.

#### Proton Nuclear Magnetic Resonance Spectroscopy, <sup>1</sup>HNMR

Peptide and peptide:GAG samples were prepared directly in D<sub>2</sub>O (Deuterium Oxide, Sigma Aldrich 99.9% D) containing 130 mM NaCl (Sodium Chloride, Fisher Scientific, analytical grade) and 1.25 mM TMSP (deuterated Sodium 3-(trimethylsilyl)propionate-2,2,3,3-d<sub>4</sub>, Cambridge Isotope Laboratories, chemical shift 0 ppm) an internal reference standard. The samples were vortexed for 20 seconds, and then sonicated for 30 minutes. Solution pD was measured and adjusted to 7.4 ± 0.3 using the relation pD = pH + 0.4.<sup>[1]</sup> Any adjustment of pD, if necessary, was made with µL volumes of 0.1 to 1 mol dm<sup>-3</sup> DCl (Deuterium Chloride, 35% wt diluted with D<sub>2</sub>O, Sigma Aldrich, 99% D) and/or 0.1 to 1 mol dm<sup>-3</sup> NaOD (Sodium Deuterioxide, 40% wt, diluted with D<sub>2</sub>O, Sigma Aldrich, 99% D). Finally, solution vials were closed, sealed with PTFE tape, and then warmed to approximately 80°C to maximise peptide solubility. For the peptide:GAG the chondroitin-6-sulphate solutions were mixed with the peptide solutions while the samples were still warm. The mixture was vortexed again to ensure complete mixing.

NMR data were acquired at room temperature with a Bruker DPX 300 spectrometer, operating at 300 MHz (5 mm probe, spectral width 5995 Hz). A presaturation program was used to minimize the water peak, and 1024 scans were measured per spectrum.

Peptide self-assembly was measured by integrating the splitting pattern of the aromatic region of <sup>1</sup>HNMR spectra and normalising with respect to the area of a control peak of TMSP using MestReNova (Mestrelab Research) to process the spectra. In a monomeric state, the coupling interactions between each nucleus is fast and so have well defined line widths, upon, self-assembly the intermolecular freedom decreases and the line widths broaden. Plotting the integral with respect to concentration, the fraction of monomer was determined.

#### Fourier Transform Infra-Red Spectroscopy, FTIR

Peptide and peptide:GAG samples were prepared as above for <sup>1</sup>HNMR but without the addition of TMSP. Samples were placed between CaF<sub>2</sub> crystals and their spectra acquired four days after preparation with a Thermo Scientific Nicolet 6700 FTIR spectrometer. Spectra were averages of 32 scans recorded at room temperature. Blank solvent spectra were subtracted from the sample trace, the baseline corrected and the spectra smoothed. Processed spectra were band fitted in the amide I' region (1720-1580 cm<sup>-1</sup>) using the Peak Resolve routine in OMNIC7.3 SP1 (Thermo Electron Corporation), providing information on the number and positions of individual component bands. The peak positions corresponding to secondary structures used to determine β-sheet content are presented in the table below:

| Amide I' band (cm <sup>-1</sup> ) | Secondary structure assignment |
|-----------------------------------|--------------------------------|
| 1613-1630                         | $\beta$ -sheet                 |
| 1642-1649                         | Unordered                      |
| 1649-1655                         | $\alpha$ - helix               |
| 1658-1674                         | Turn                           |
| 1682-1690                         | Anti-parallel $\beta$ -sheet   |
| 1694-1697                         | Turn                           |

In the purification of peptides, trifluoroacetic acid, TFA is used, which leads to it being present in the peptide material as a counter ion bound to the positively charged residues. TFA has a FTIR band located at 1673 cm<sup>-1</sup> and peptides with greater number of arginine and ornithine residues will contain more TFA and therefore a large TFA peak in the FTIR spectra.

### Transmission electron microscopy, TEM

P<sub>11</sub>-9 and P<sub>11</sub>-9:GAG samples were prepared in DPBS (Dubeccos phosphate buffered saline, Sigma Aldrich), solution containing 0.04% NaN<sub>3</sub>, (Sodium azide, Sigma Aldrich, 99%) to prevent bacterial growth. The samples were vortexed for 20 seconds, and then sonicated for 30 minutes. Solution pH was measured and adjusted to 7.4  $\pm$  0.3. Any adjustment of pH, if necessary, was made with  $\mu$ L volumes of 0.1 to 1 mol dm<sup>-3</sup> HCL (Hydrochloric acid, Fisher Scientific, analytical reagent grade, 37% wt diluted with purified water), and/or 0.1 to 1 mol dm<sup>-3</sup> NaOH (Sodium hydroxide pellets, Fisher Scientific, analytical grade, dissolved in and diluted with purified water). Solution vials were closed, sealed with PTFE tape, and then warmed to approximately 80°C to maximise peptide solubility. Following warming GAG powder was added to the peptide solutions and the mixture was vortexed to ensure complete mixing. The resulting gels were left to equilibrate for approximately four and a half months.

For P<sub>11</sub>-4, P<sub>11</sub>-8 and P<sub>11</sub>-12, samples with and without GAG prepared for FTIR were used, these were left to equilibrate for 4 days prior to TEM grid preparation.

The gels were then diluted (20  $\mu$ L of sample in 60  $\mu$ L D<sub>2</sub>O) minutes prior to addition to the TEM grids. Glow discharged carbon film coated copper TEM grids (Agar Scientific) were touched onto the peptide and peptide:gag solutions for one minute. The grid was air-dried and then negatively stained with uranyl acetate solution (2% w/v) for 20 seconds and air-dried.

TEM images for P<sub>11</sub>-4, P<sub>11</sub>-8 and P<sub>11</sub>-12, samples with and without GAG were obtained using a Jeol JEM1400 transmission electron microscope operating at 120 kV accelerating voltage. TEM images of P<sub>11</sub>-9 with and without GAG were obtained using a Philips CM10 electron microscope operating at 80 kV accelerating voltage.

### Rheometry

Peptide and peptide:GAG samples were prepared in DPBS (Dubeccos phosphate buffered saline, Sigma Aldrich), solution containing 0.04% NaN<sub>3</sub> (sodium azide, Sigma Aldrich, 99%). The samples were vortexed for 20 seconds, and then sonicated for 30 minutes. Solution pH was measured and adjusted to 7.4  $\pm$  0.3. Any adjustment of pH, if necessary, was made with  $\mu$ L volumes of 0.1 to 1 mol dm<sup>-3</sup> HCL (hydrochloric acid, Fisher Scientific, analytical reagent grade, 37% wt diluted with purified water), and/or 0.1 to 1 mol dm<sup>-3</sup> NaOH (Sodium hydroxide pellets, Fisher Scientific, analytical grade, dissolved in and diluted with purified water). Solution vials were closed, sealed with PTFE tape, and then warmed to approximately 80°C to maximise peptide solubility. Following warming GAG powder was added to the peptide solutions and the mixture was vortexed to ensure complete mixing. The resulting gels were left to equilibrate at room temperature (P<sub>11</sub>-4 20 days, P<sub>11</sub>-8 1.5 months, P<sub>11</sub>-9 one month and P<sub>11</sub>-12 two months).

Rheometry measurements used a Malvern Kinexus Pro rheometer with a cone-plate geometry (cone angle: 1°, diameter: 50 mm, gap: 0.033 mm). All tests were performed at 25 °C, utilizing a solvent trap and the atmosphere within was kept saturated to minimize evaporation of the peptide samples. The geometry was lowered into position and samples incubated for 15 min.

To ensure measurements were made in the linear viscoelastic regime, amplitude sweeps were performed in a shear strain controlled mode from 0.01-100% at 1 Hz and 20 Hz.

The dynamic moduli of the hydrogels were measured as a frequency function with the sweeps carried out between 1 and 20 Hz.

## **Bovine disc model preparation**

Bovine tails were harvested from calves aged less than 30 months at a local abattoir. To avoid potential damage to the tissue, the discs were stored at 2-8°C prior to experimentation. The tails were cleaned and the spinous processes removed. The discs (C1-C6) were then excised via a transverse cut between the disc and the most cranial cartilage end plate and via a transverse cut through the vertebra, leaving ~10 mm of bone attached to the most caudal side of the disc.

They were placed in monosodium citrate at pH 7.4 for 20 minutes to remove excess blood and through swelling pressures help differentiate the nucleus pulposus from the annulus fibrosus tissue. The discs were then removed from the solution and the nucleus pulposus tissue was excised. The disc and nucleus tissue were weighed prior to and post removal. The discs were then attached to lightly sanded artificial Perspex endplates (2x40x40 mm) using the adhesive Loctite 3090 (Henkel).

For each GAG or Peptide:GAG ratio investigated, discs were chosen from more than one tail over the range of C1 to C6 to try to eliminate variables in disc size, natural GAG levels and tail health. For each group studied, a control of no GAG injection to a denucleated disc was used to determine the average natural GAG leakage over all six tails.

## **Assessment of GAG leakage through the annulus fibrosus and injection hole**

GAG only and peptide solutions were prepared in PBS (phosphate buffered saline solution) and vortexed for 1 min. A total of 250 µl of solution was injected into a disc using a 25 gauge needle (outer diameter 0.51 mm) and syringe with a second 25 G needle as an air hole. For the peptide:GAG augmented discs following an initial injection of 125 µl of the peptide solution, 125 µl of the GAG was injected through the second 25 G needle, retaining the needle used for the peptide injection as a new air hole.

Following injections, the discs were placed in 30 ml of PBS on a orbital shaker for 48 hours. 3 ml aliquots were removed from the surrounding PBS at 24 hours and 48 hours. The 3ml PBS aliquots were analysed via a standard DMMB (dimethylmethylene blue) assay using chondroitin-6-sulphate sodium salt (Sigma Aldrich) to construct the standard curve.

Values are reported as means  $\pm$  standard error of the mean (SEM), n=3. Results of DMMB assays were analyzed by one-way ANOVA, followed by Tukey's multiple comparison test and were assessed for their statistical significance via paired t-tests (P values < 0.05 were considered as statistically significant).

## **Static compressive loading**

Bovine caudal discs were obtained and prepared as per the above GAG leakage study.

Following preparation, all discs were sealed in individual plastic bags with PBS soaked tissue paper to prevent samples drying and stored at 2-8°C overnight. The most caudal vertebra section of each sample was then cast in 70 mm diameter PMMA cement (polymethylmethacrylate, WHW Plastics) to produce a flat surface that was parallel to the Perspex endplate. Once set, the samples were stored in individual sealed plastic bags containing PBS soaked tissue paper at 2-8°C until testing.

All specimens underwent static axial compressive loading from 0 to 9 kN using displacement control at a low load rate of 1 mm/min. The experiments were carried out on an Instron 3366 materials testing machine with a 10 kN load cell (Instron, UK).

It should be noted that at the start of each test, the fixture on the crosshead of the materials testing machine was brought into contact with the Perspex endplate until a load of 0.3 N was recorded. At this point, the displacement and load were zeroed and the test was started.

From the resulting load/displacement plots the normalised stiffness was calculated by multiplying by the specimen height and dividing by its cross-sectional area.

Values are reported as means  $\pm$  standard error of the mean (SEM), n=6. Results were analyzed by one-way ANOVA, followed by Tukey's multiple comparison test and were assessed for their statistical significance via paired t-tests (P values < 0.05 were considered as statistically significant).

[1] Glasoe, P. K. & Long, F. A. Use of Glass Electrodes to Measure Acidities in Deuterium Oxide. Journal of Physical Chemistry 64, 188-190 (1960).

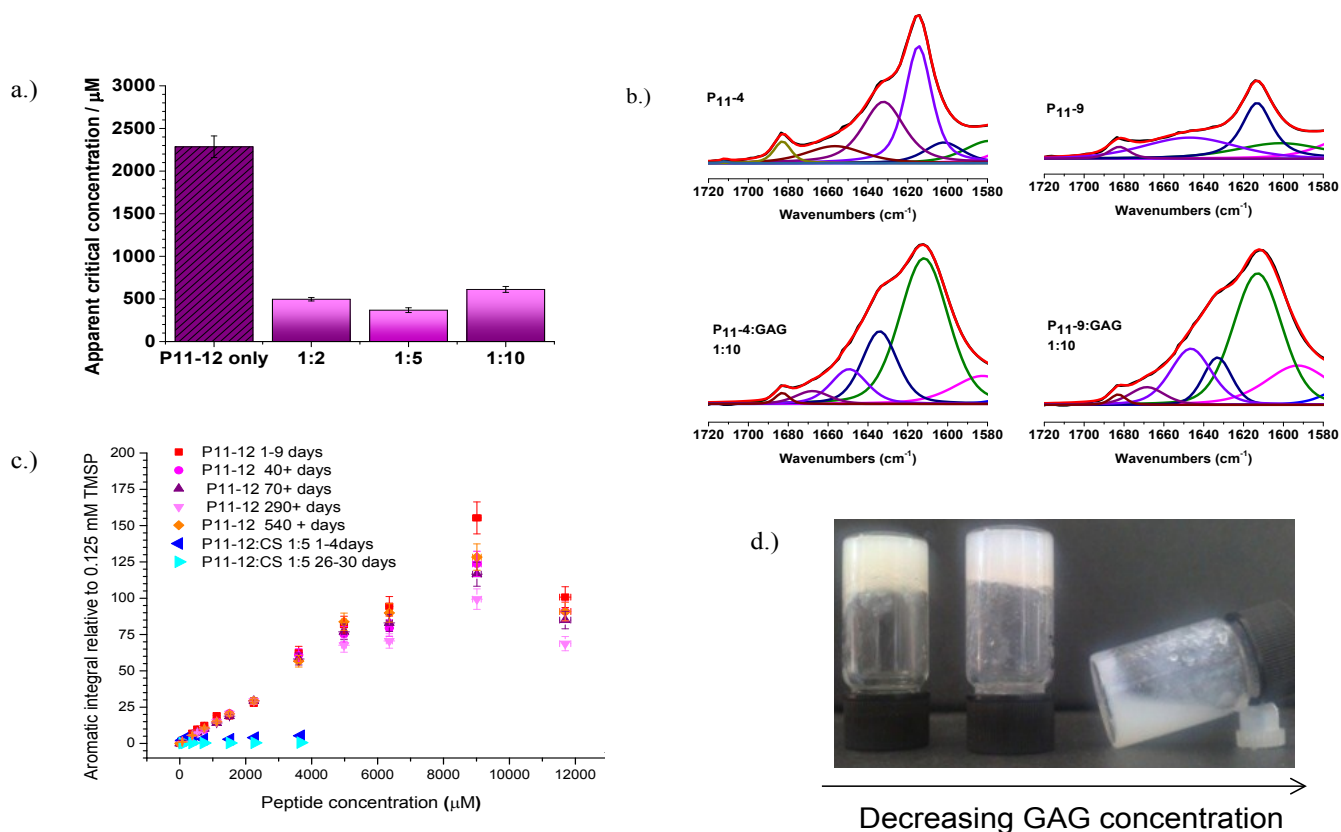

**Figure S1. GAG accelerates the self-assembly and gelation kinetics of P<sub>11</sub> peptides** a.) Apparent critical concentration for aggregation as determined by <sup>1</sup>HNMR for P<sub>11</sub>-12 only and P<sub>11</sub>-12:GAG 1:2, 1:5 and 1:10 samples. b.) Band fitted FTIR amide I' bands of P<sub>11</sub>-4, P<sub>11</sub>-4:GAG 1:10, P<sub>11</sub>-9 and P<sub>11</sub>-9:GAG 1:10 c.) <sup>1</sup>HNMR aromatic region integral of P<sub>11</sub>-12 relative to integral of 0.125 mM TMSP reference peak as a function of increasing peptide concentration and time from sample preparation with and without the presence of GAG at a ratio of 1:5. Demonstrating an increase in the kinetics of the system upon the addition of GAG. d.) Image: From left to right P<sub>11</sub>-8:GAG 1:10, 1:2 and P<sub>11</sub>-8 only on day of preparation, demonstrating faster gelation kinetics upon addition of GAG.

| Peptide             | GAG ratio | Time to gel ( peptide concentration = 20 mg/ml) |
|---------------------|-----------|-------------------------------------------------|
| P <sub>11</sub> -4  | Control   | Minutes -hours                                  |
|                     | 1:2       | Seconds-minutes                                 |
|                     | 1:10      | Seconds                                         |
| P <sub>11</sub> -8  | Control   | Days                                            |
|                     | 1:2       | Seconds                                         |
|                     | 1:10      | Seconds                                         |
| P <sub>11</sub> -9  | Control   | Minutes                                         |
|                     | 1:2       | Seconds                                         |
|                     | 1:10      | Seconds                                         |
| P <sub>11</sub> -12 | Control   | Minutes                                         |
|                     | 1:2       | Seconds                                         |
|                     | 1:10      | Seconds                                         |
|                     | 1:50      | Spontaneous                                     |
|                     | 1:100     | Spontaneous                                     |

**Table S1.** Typical gelation times in 20mg/ml samples

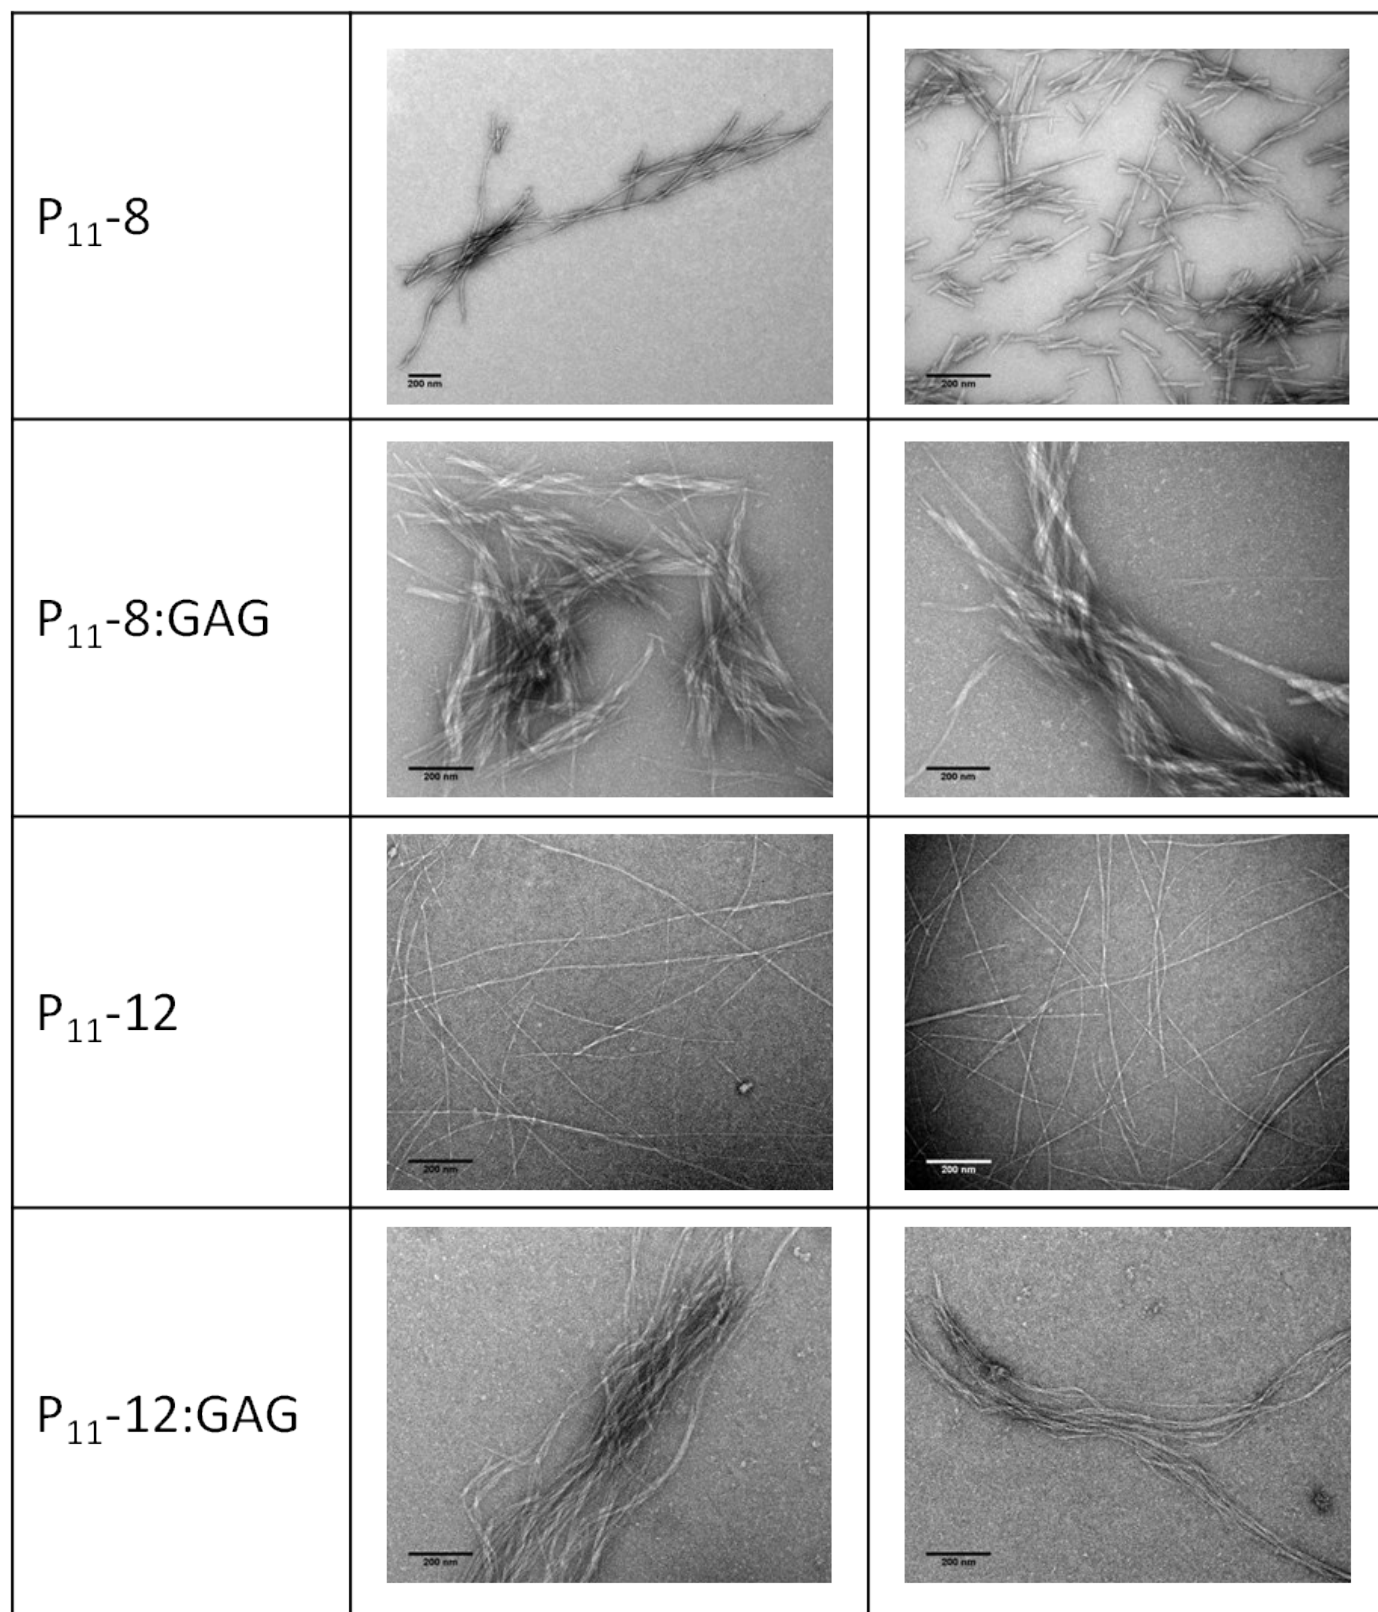

**Figure S2.** TEM images showing morphology of cationic peptide aggregates, samples with a peptide concentration of 20 mg/ml at 4 days old, images taken at x20,000 magnification, scale bars = 100 nm

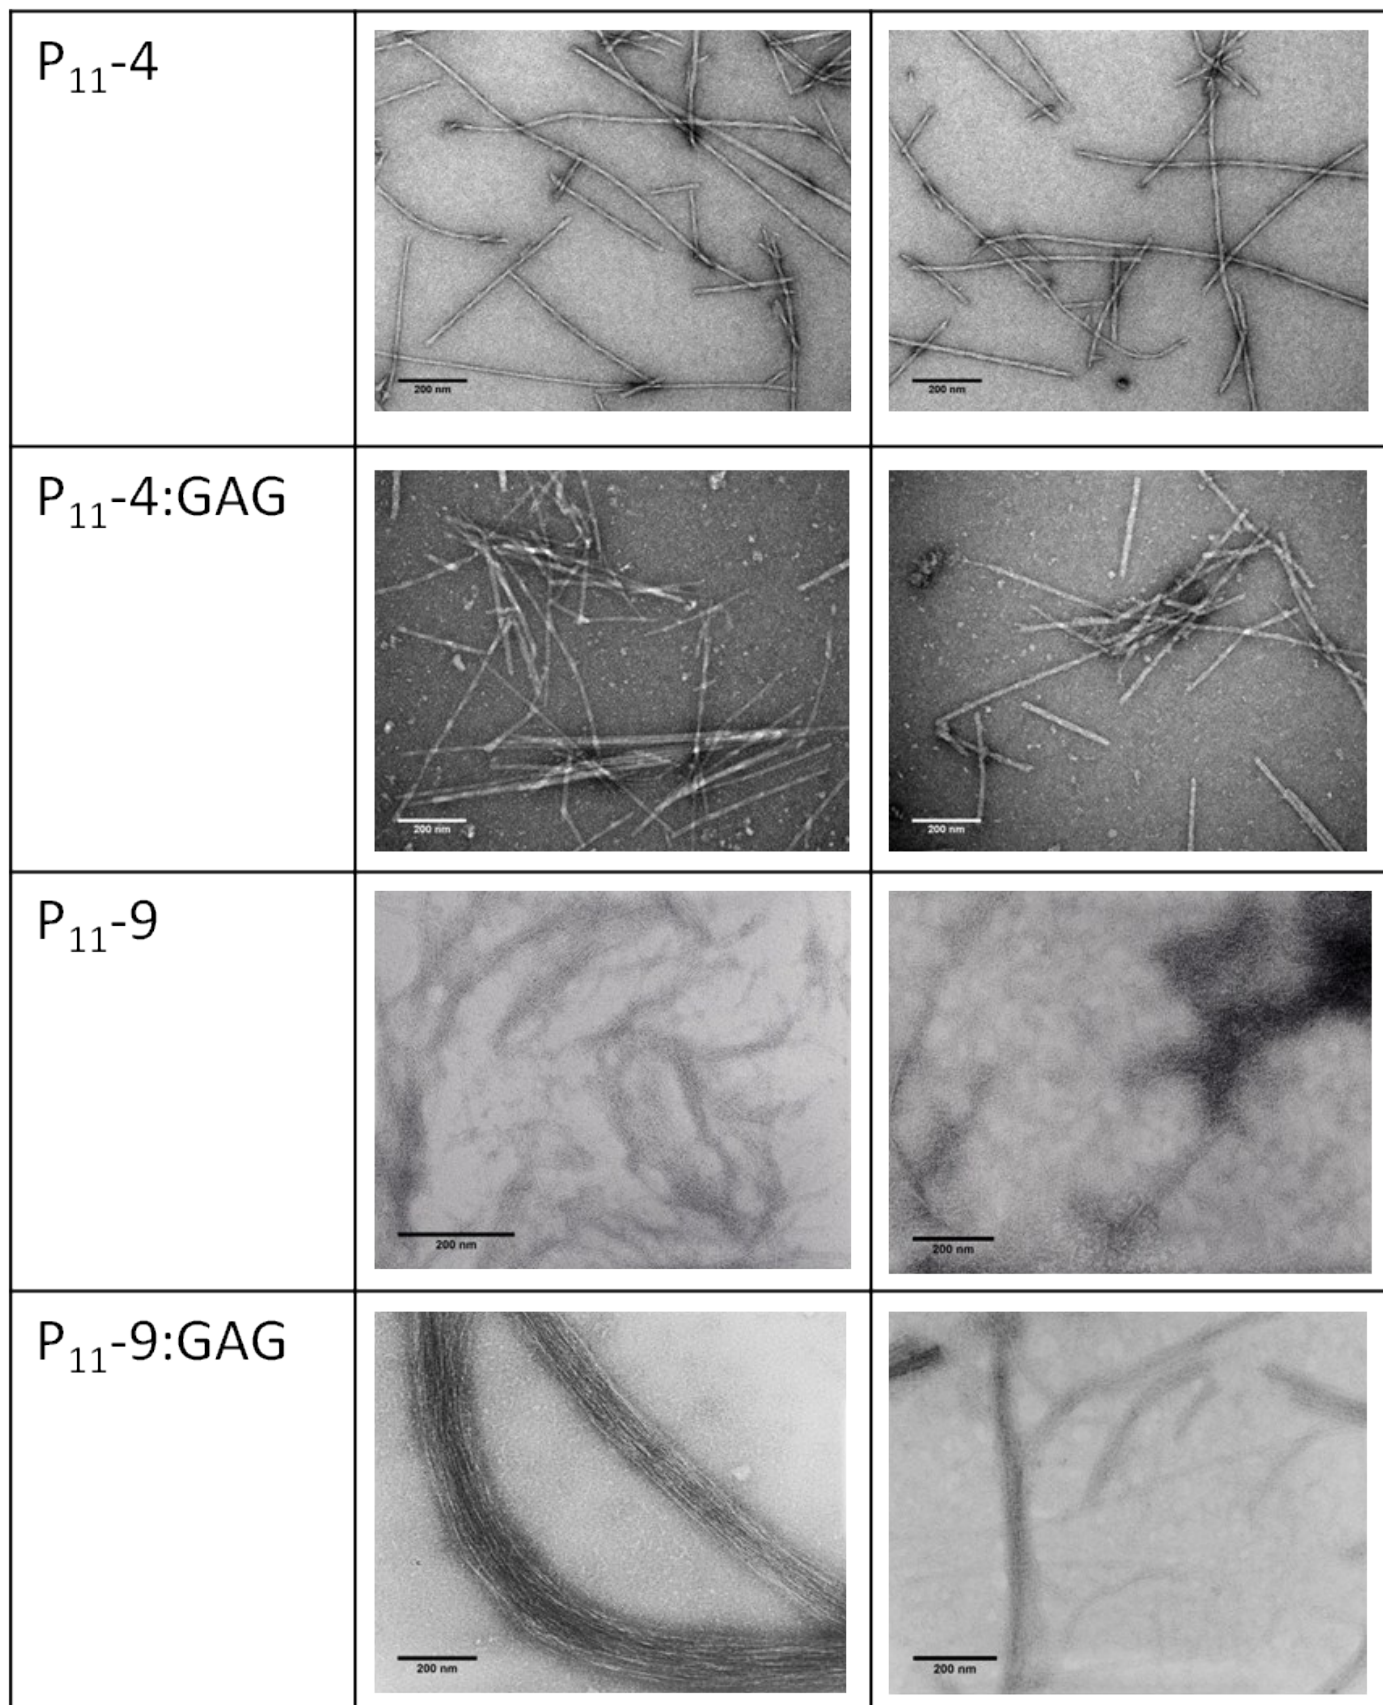

**Figure S3.** TEM images showing morphology of anionic peptide aggregates, samples with a peptide concentration of 20 mg/ml, images taken at x20,000 (P<sub>11</sub>-4 and P<sub>11</sub>-4:GAG), x73,000 (P<sub>11</sub>-9 right hand side and P<sub>11</sub>-9:GAG) and 105,000x (P<sub>11</sub>-9 left hand side) magnification, scale bars = 100 nm

|                              | Fibril width (nm) | Ribbon width (nm) | Twist pitch (nm)                                                         | Large loose bundle /fibre width (nm) | Morphology                  |
|------------------------------|-------------------|-------------------|--------------------------------------------------------------------------|--------------------------------------|-----------------------------|
| <b>P<sub>11</sub>-4</b>      | 14.6 ± 3.7        | -                 | 76.6 ± 17.1                                                              | -                                    | Twisted fibrils             |
| <b>P<sub>11</sub>-4:GAG</b>  | 17.5 ± 3.6        | -                 | -                                                                        | 132.4 ± 52                           | Fibrillar bundles           |
| <b>P<sub>11</sub>-8</b>      | 13.2 ± 3.3        | 5.06 ± 1.2        | 135.2 ± 22.1                                                             | -                                    | Twisted fibrils             |
| <b>P<sub>11</sub>-8:GAG</b>  | 14.5 ± 3.6        | -                 | Fibrils near bundles 1113.2 ± 102.3<br>Fibrils on their own 211.4 ± 18.5 | 525.7 ± 331.3                        | Fibrillar bundles           |
| <b>P<sub>11</sub>-9</b>      | -                 | 4 ± 1             | -                                                                        | -                                    | Ribbons                     |
| <b>P<sub>11</sub>-9:GAG</b>  | -                 | -                 | -                                                                        | 115 ± 15                             | Fibrillar bundles           |
| <b>P<sub>11</sub>-12</b>     | 10.1 ± 2.6        | 5.0 ± 0.8         | 114.3 ± 10.3                                                             | 43.7 ± 11.5                          | Twisted fibrils and ribbons |
| <b>P<sub>11</sub>-12:GAG</b> | 11.6 ± 2.4        | 5.2 ± 1.1         | -                                                                        | 94.2 ± 26.6                          | Fibrillar bundles           |

**Table S2.** Peptide and Peptide:GAG 1:10 morphology and dimensions of structures as determined by TEM

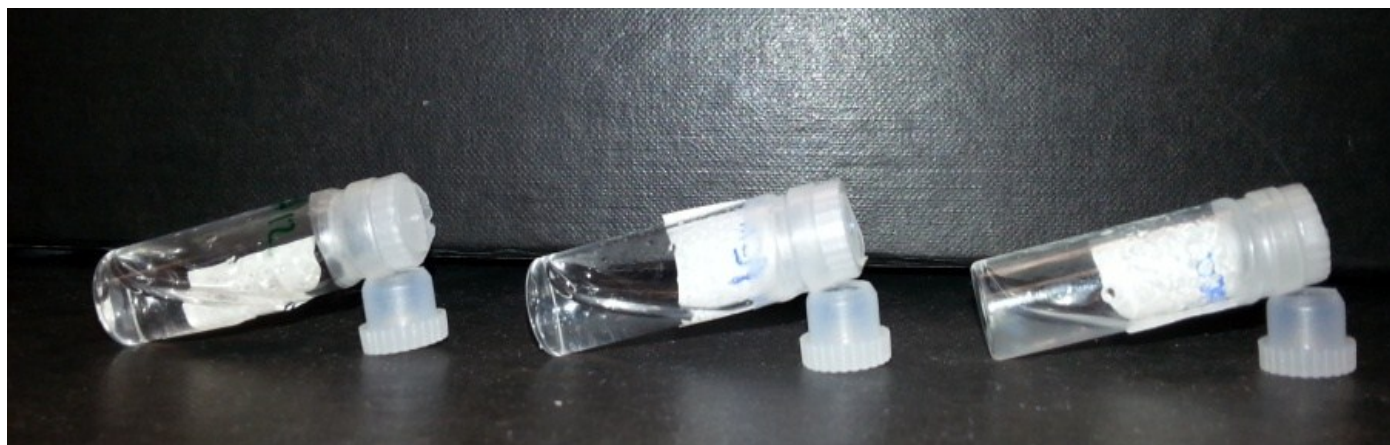

**Figure S3.** From left to right P<sub>11</sub>-12, P<sub>11</sub>-12:PEG (Mw 10k), P<sub>11</sub>-12:PEG (Mw 100k). 130 mM NaCl in D<sub>2</sub>O, PEG added at same wt% as 1:10 Pep:GAG ratio. All samples = liquid

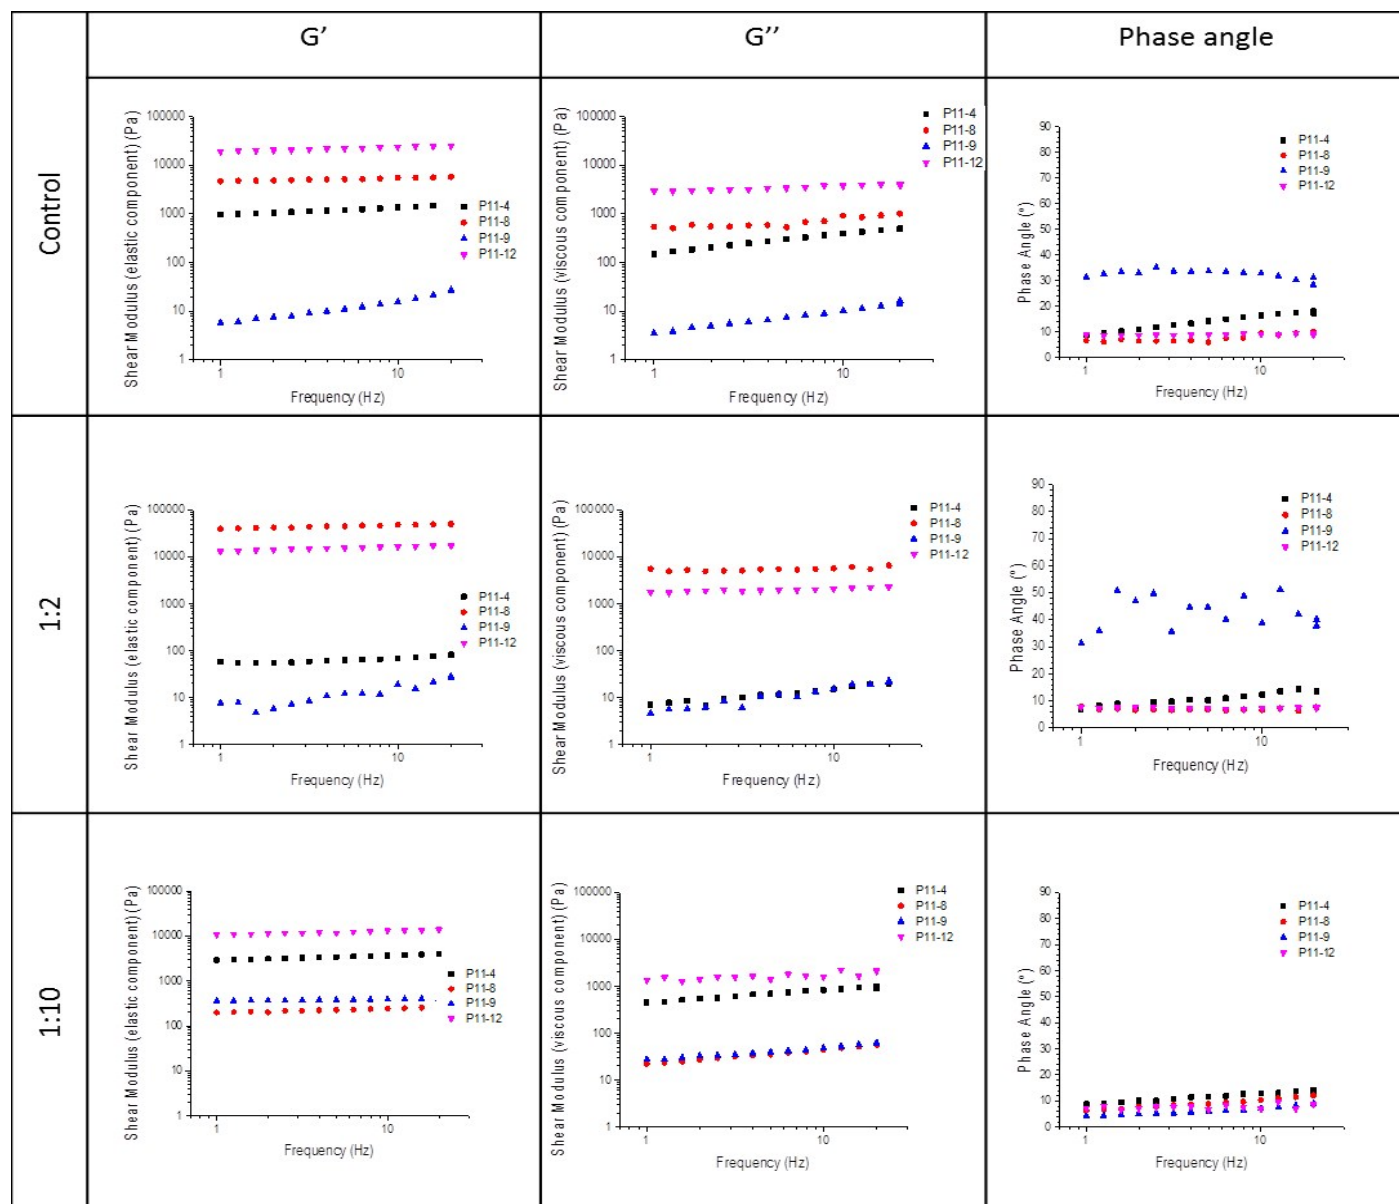

**Figure S4.** Gel rheological properties of peptide control, peptide:GAG 1:2 and peptide:GAG 1:10, for P<sub>11</sub>-4, P<sub>11</sub>-8, P<sub>11</sub>-9 and P<sub>11</sub>-12. P<sub>11</sub>-4 samples 2 months old, P<sub>11</sub>-8 samples 1 month old, P<sub>11</sub>-9 samples 2 months old, P<sub>11</sub>-12 samples 2 months old. As the phase angle is relatively constant for these materials the trend for the viscous and elastic components is similar with an order of magnitude difference.

| Peptide             | Theoretical mass /Da | HPLC purity /% | Peptide content /% |
|---------------------|----------------------|----------------|--------------------|
| P <sub>11</sub> -4  | 1596                 | 97.3           | 94                 |
| P <sub>11</sub> -8  | 1566                 | 96.3           | 79                 |
| P <sub>11</sub> -9  | 1432                 | 97 ± 2         | 92 ± 3             |
| P <sub>11</sub> -12 | 1402                 | 97.2 ± 1       | 74 ± 1             |

**Table S3.** Summary of peptide purity and content values across batches for in-house and company supplied data
